# Supplementary material for: Cystathionine β‐Synthase Regulates the Proliferation, Migration, and Invasion of Thyroid Carcinoma Cells
Source: Hindawi journal article supplement (doi:10.1155/2022/8678363), 2022-01-01

**Figure S1**

**a**

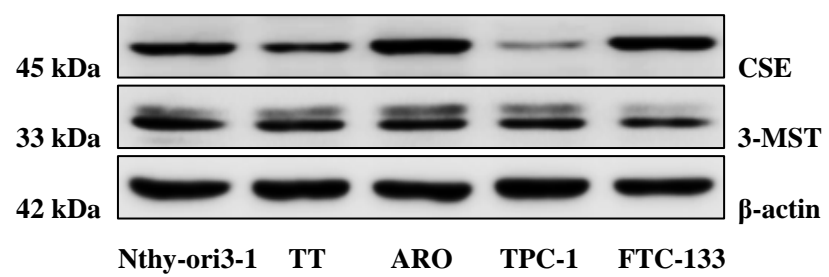

**b**

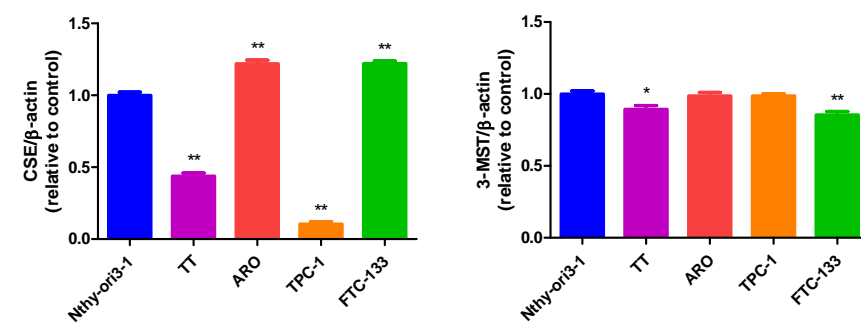

**Figure S2**

**a**

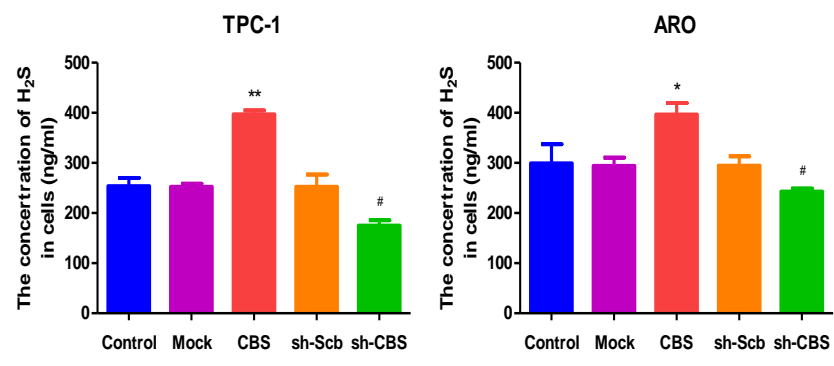

**b**

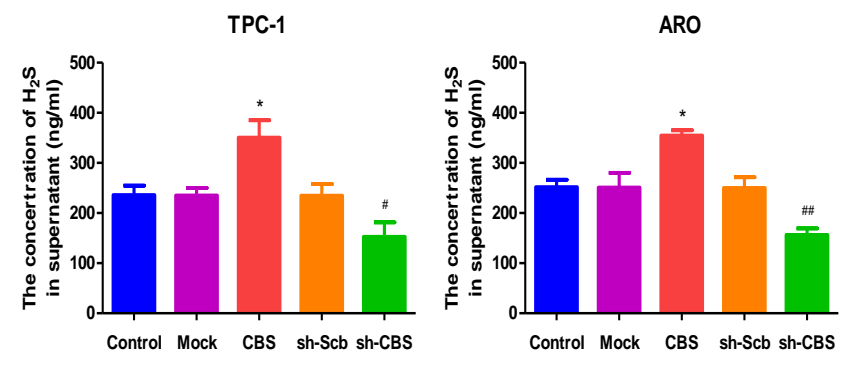

Figure S3

**a**

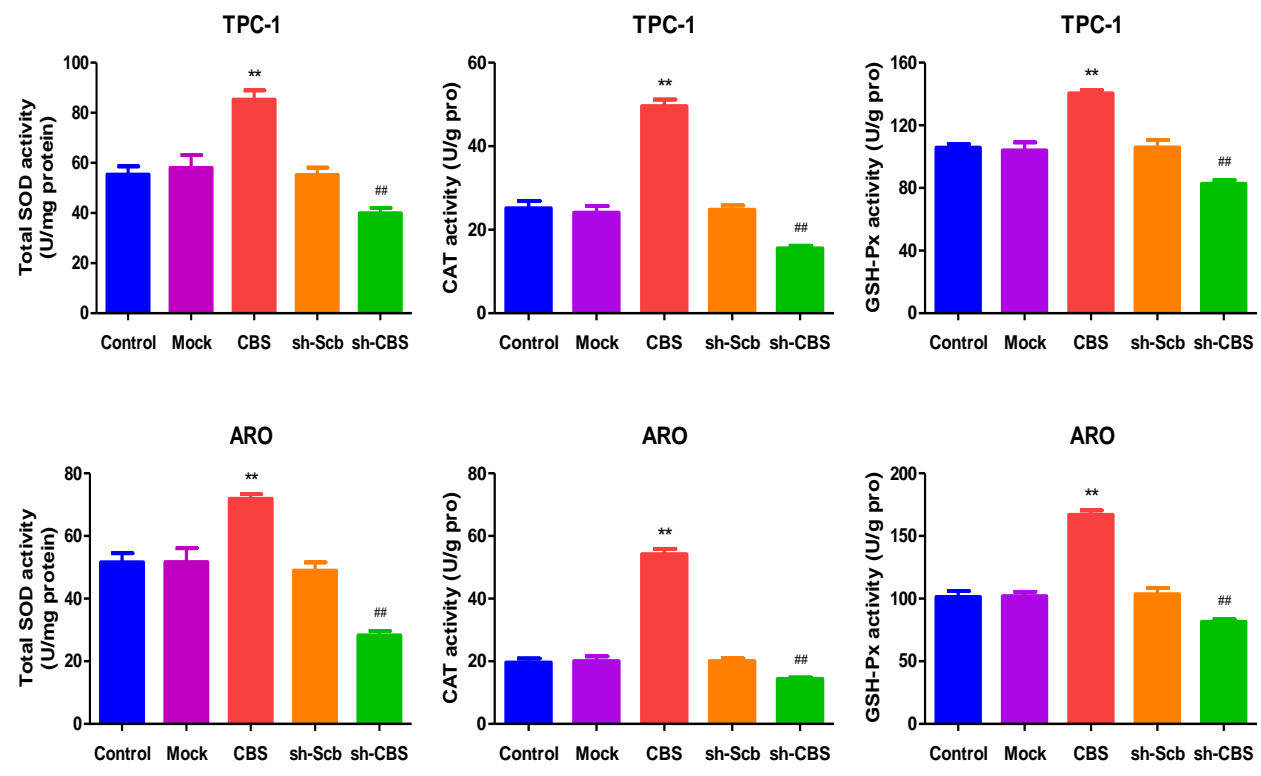

**Figure S4**

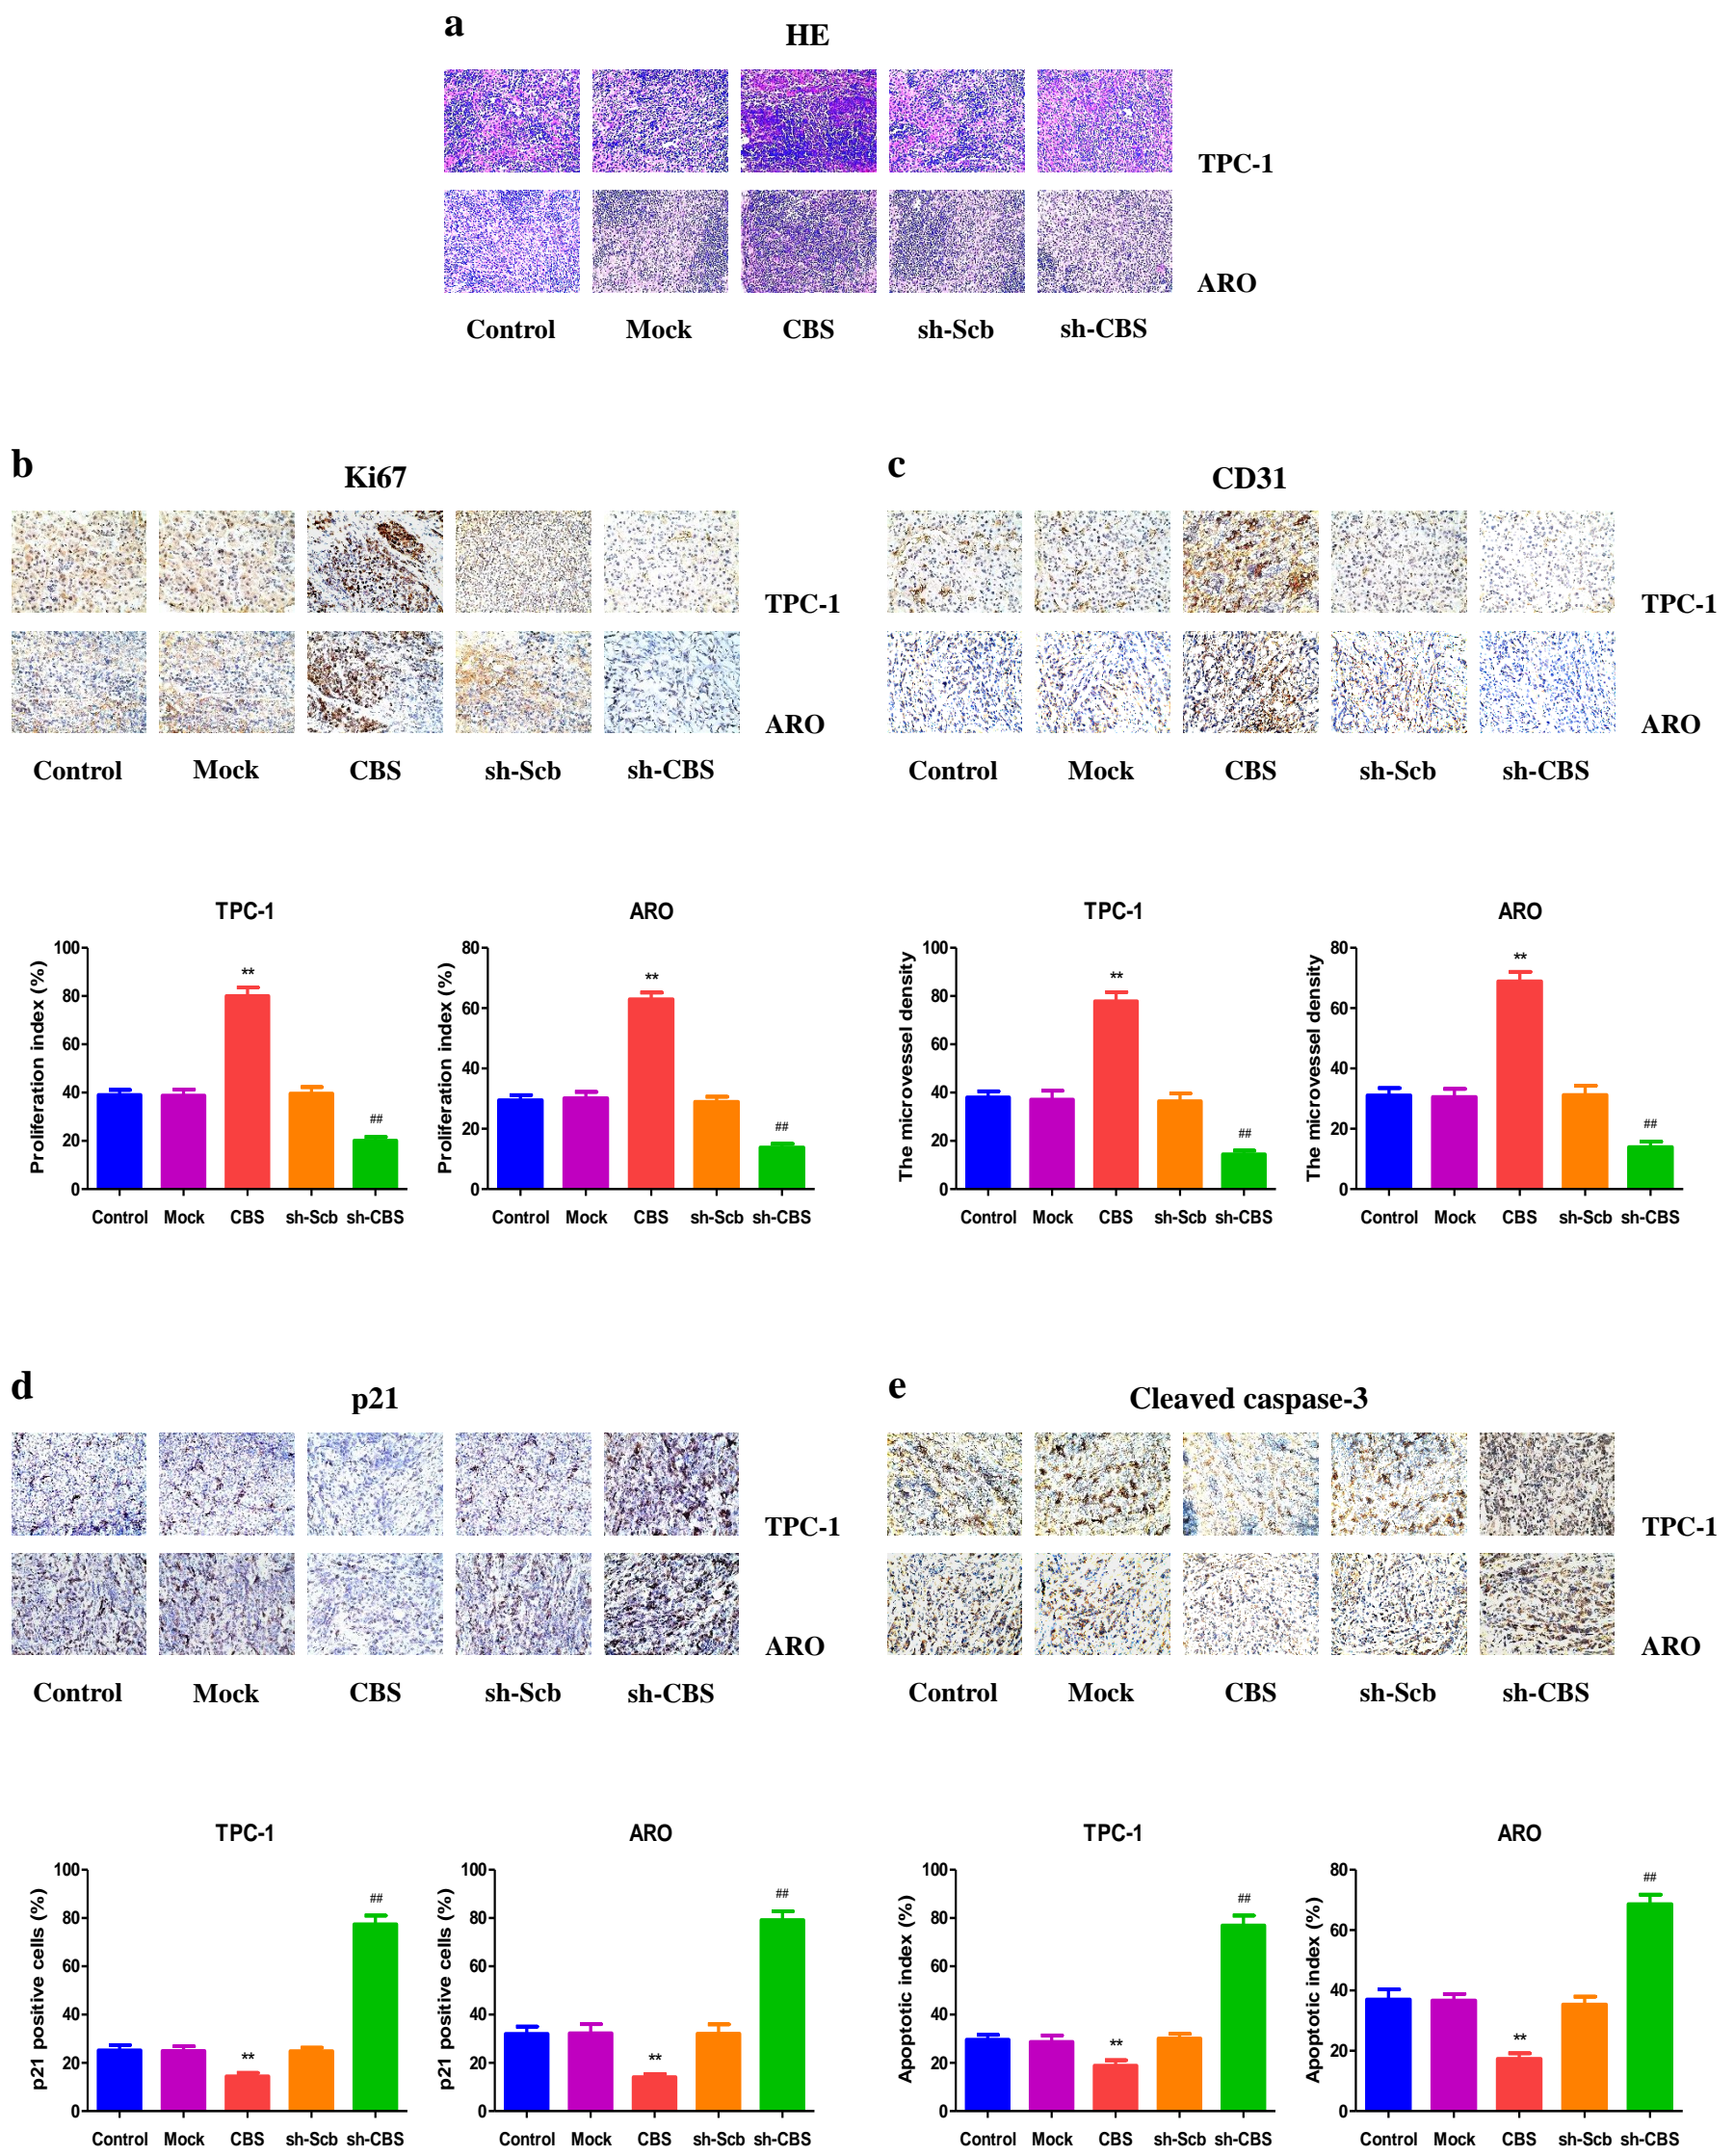

Figure S5

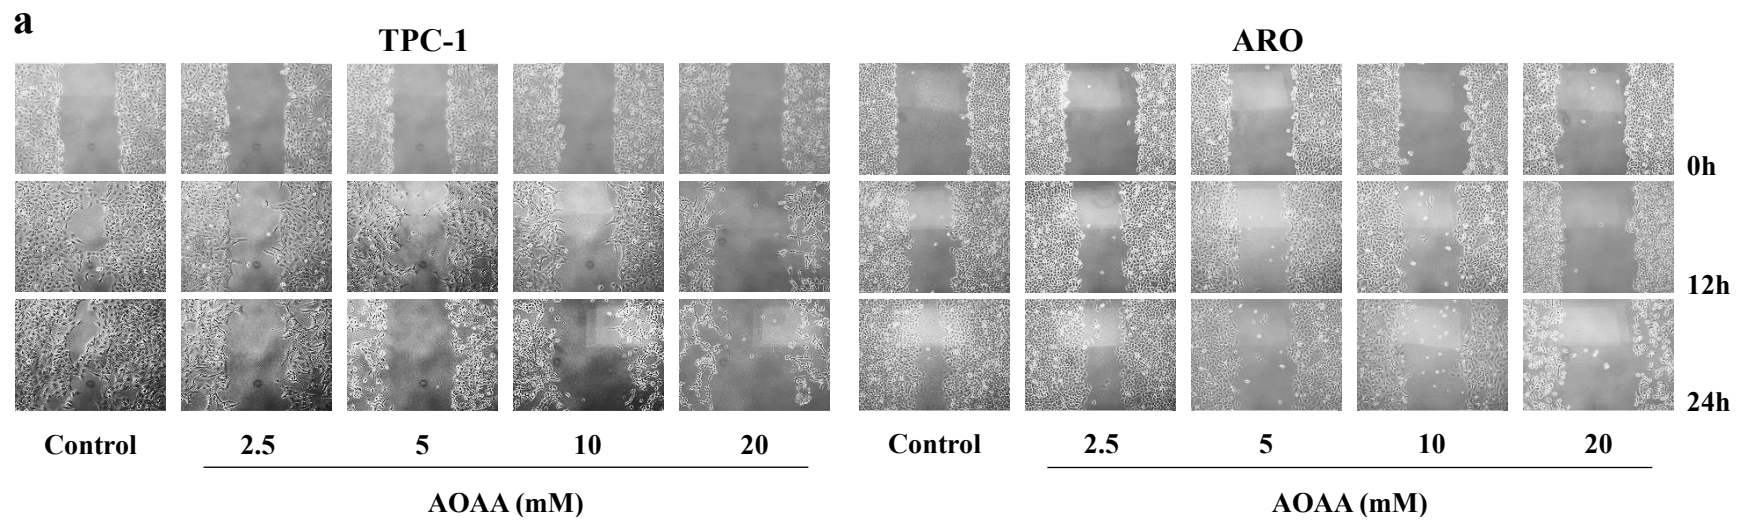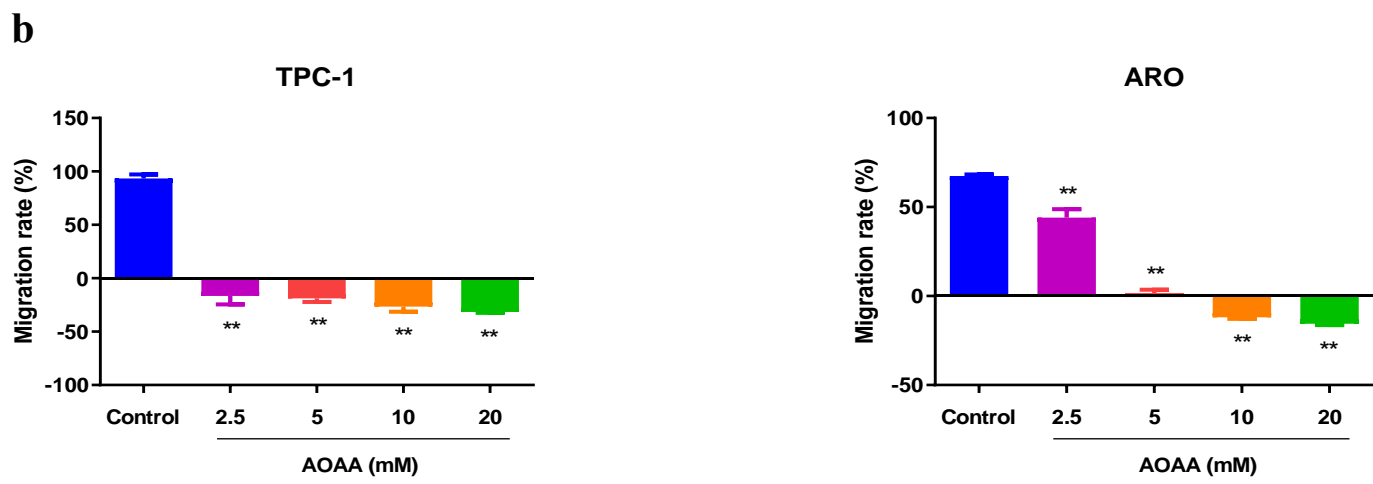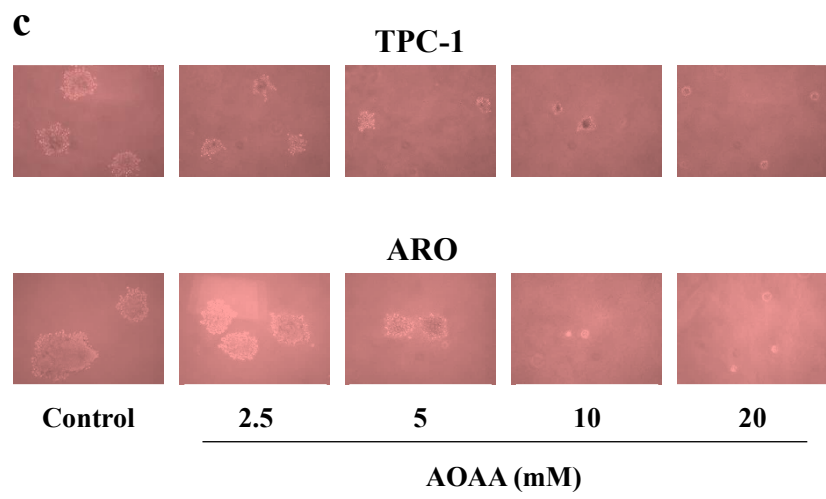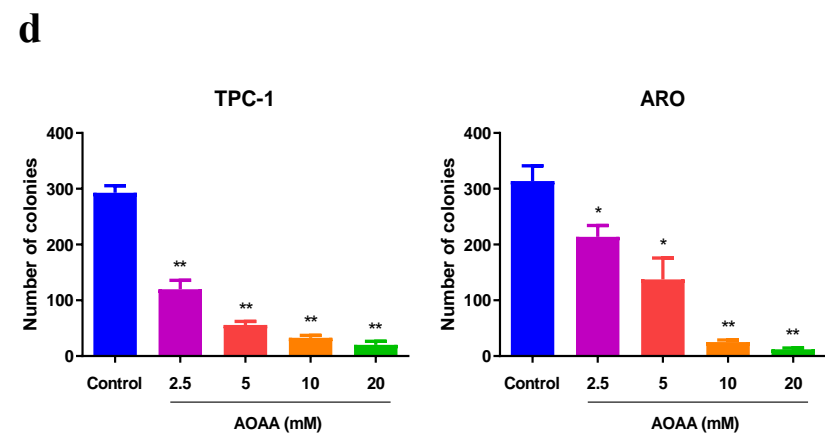

Figure S6

a

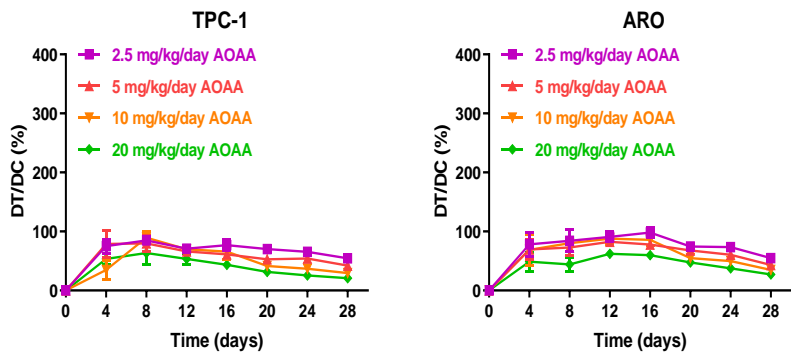

b

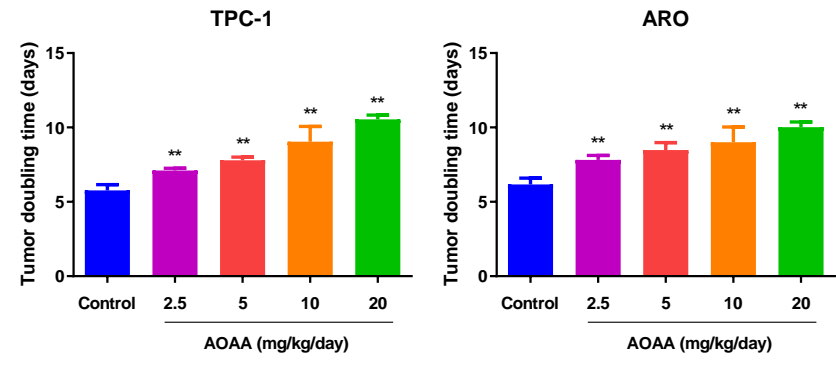

c

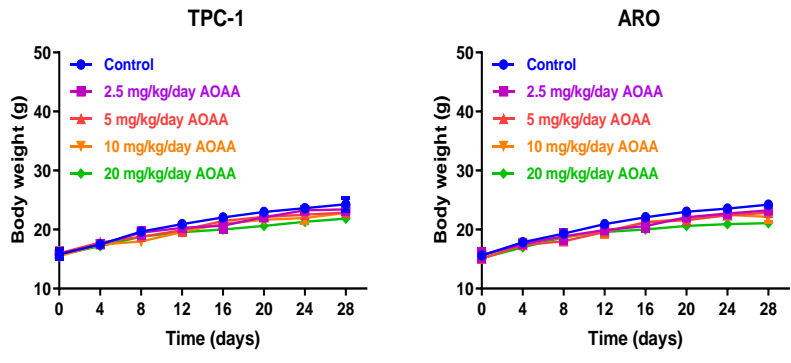

d

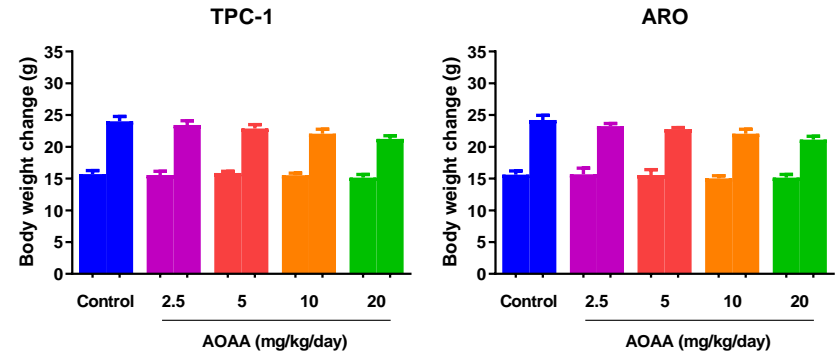

Supplement: f1 [file 8678363.f1.pdf]
